# Supplementary material for: Production of IgG antibodies to pneumococcal polysaccharides is associated with expansion of ICOS+ circulating memory T follicular-helper cells which is impaired by HIV infection
Source: PubMed Central journal article supplement (PMC5413043; doi:10.1371/journal.pone.0176641), 2017-05-02

# S1 Figure

### A ART-treated - ASC response to PcP 6B

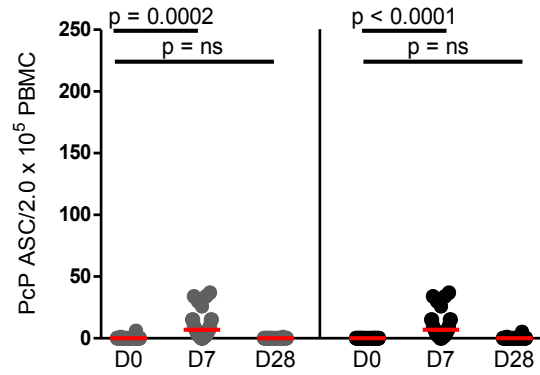

### B ART-naive - ASC response to PcP 6B

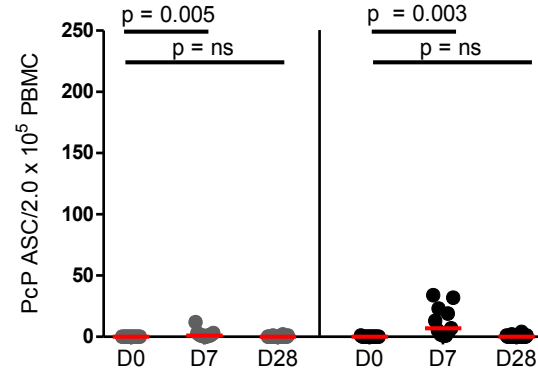

### C HIV seronegative - ASC response to PcP 6B

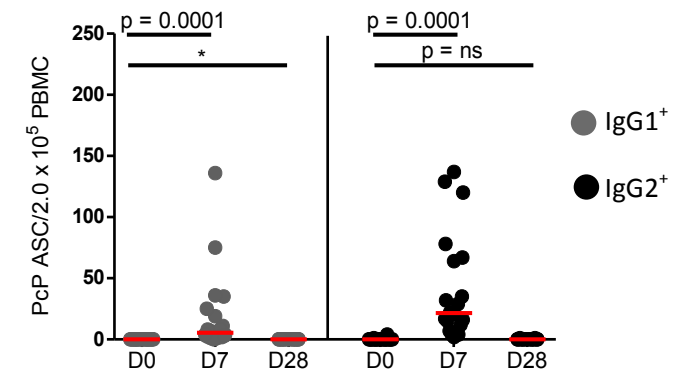

### D ART-treated - ASC response to PcP 9V

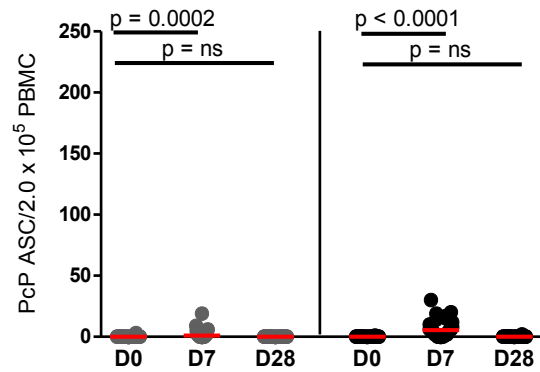

### E ART-naive - ASC response to PcP 9V

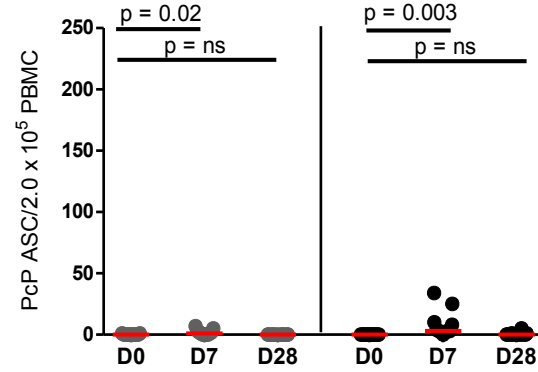

### F HIV seronegative - ASC response to PcP 9V

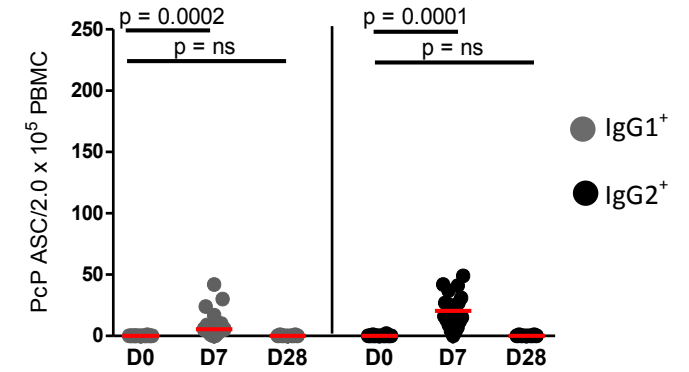

### G ART-treated - ASC response to PcP 14

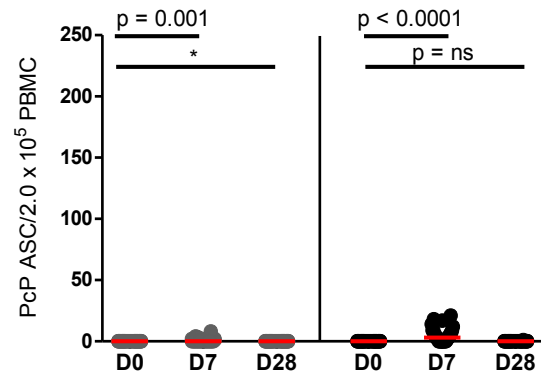

### H ART-naive - ASC response to PcP 14

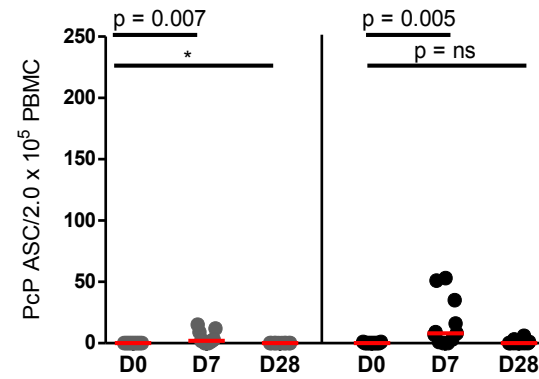

### I HIV seronegative - ASC response to PcP 14

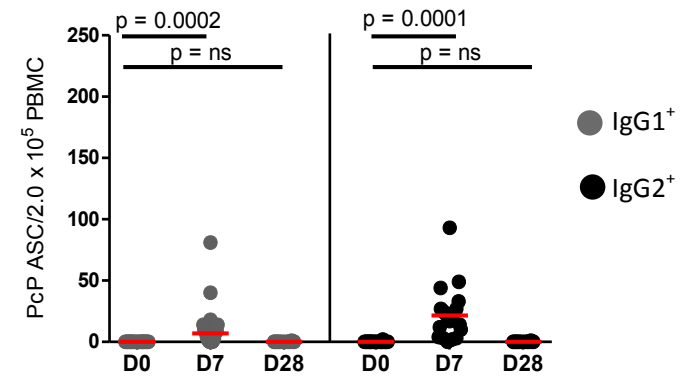

Supplement: pone.0176641.s001.pdf [file pone.0176641.s001.pdf]
