# Supplementary material for: Production of IgG antibodies to pneumococcal polysaccharides is associated with expansion of ICOS+ circulating memory T follicular-helper cells which is impaired by HIV infection
Source: PubMed Central journal article supplement (PMC5413043; doi:10.1371/journal.pone.0176641), 2017-05-02

S3 Figure

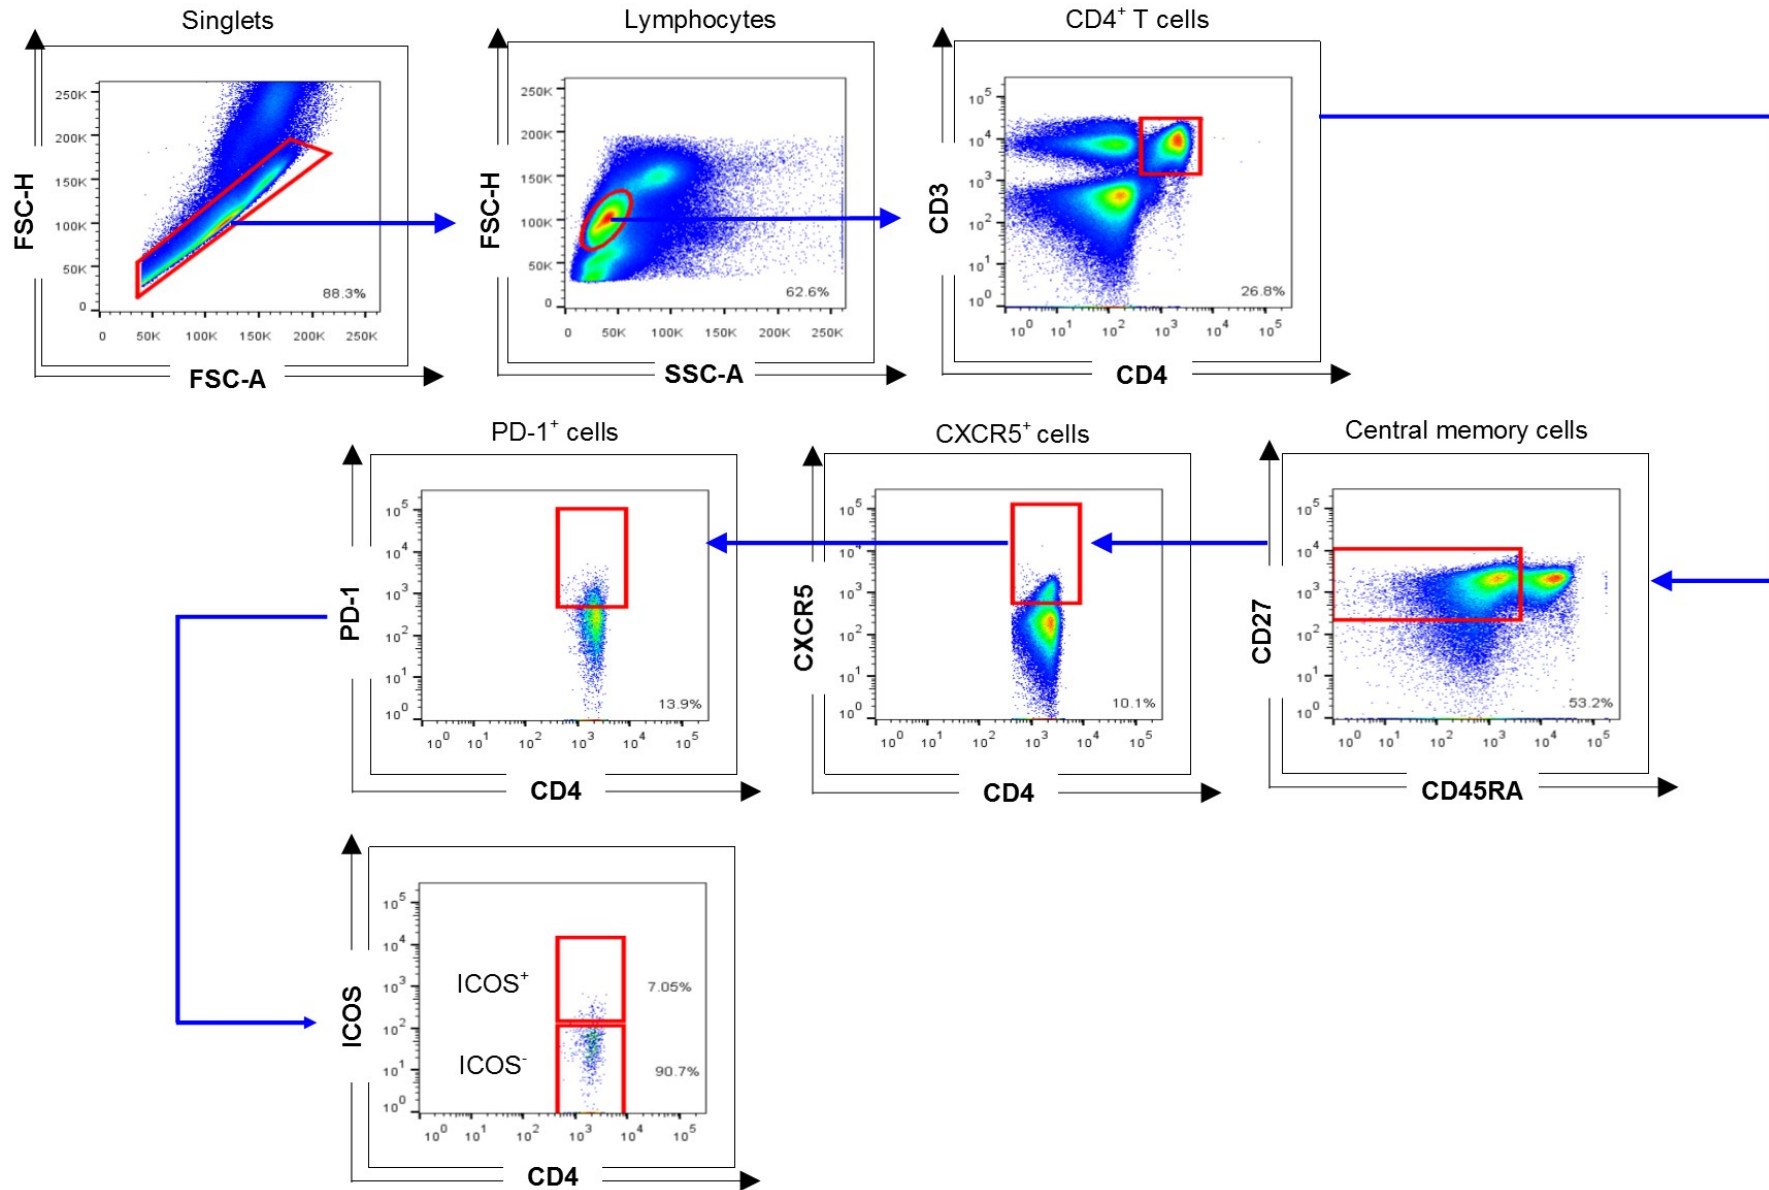

Supplement: pone.0176641.s003.pdf [file pone.0176641.s003.pdf]
