# Supplementary material for: Production of IgG antibodies to pneumococcal polysaccharides is associated with expansion of ICOS+ circulating memory T follicular-helper cells which is impaired by HIV infection
Source: PubMed Central journal article supplement (PMC5413043; doi:10.1371/journal.pone.0176641), 2017-05-02
Supplement: pone.0176641.s006.pdf [file pone.0176641.s006.pdf]

|                   |                                     | PcP 4                | PcP 6B               | PcP 9V               | PcP 14               |
|-------------------|-------------------------------------|----------------------|----------------------|----------------------|----------------------|
| IgG1 <sup>+</sup> | ICOS <sup>-</sup> cmT <sub>FH</sub> | R = 0.36<br>p = 0.12 | R = 0.24<br>p = 0.30 | R = 0.02<br>p = 0.92 | R = 0.34<br>p = 0.14 |
| IgG2 <sup>+</sup> | ICOS <sup>-</sup> cmT <sub>FH</sub> | R = 0.33<br>p = 0.15 | R = 0.33<br>p = 0.16 | R = 0.27<br>p = 0.26 | R = 0.35<br>p = 0.13 |
