# Supplementary material for: Production of IgG antibodies to pneumococcal polysaccharides is associated with expansion of ICOS+ circulating memory T follicular-helper cells which is impaired by HIV infection
Source: PubMed Central journal article supplement (PMC5413043; doi:10.1371/journal.pone.0176641), 2017-05-02
Supplement: pone.0176641.s007.pdf [file pone.0176641.s007.pdf]

|                   |                                     | PcP 4                 | PcP 6B                | PcP 9V                | PcP 14               |
|-------------------|-------------------------------------|-----------------------|-----------------------|-----------------------|----------------------|
| IgG1 <sup>+</sup> | ICOS <sup>+</sup> cmT <sub>FH</sub> | R = -0.30<br>p = 0.12 | R = -0.01<br>p = 0.95 | R = -0.33<br>p = 0.09 | R = 0.06<br>p = 0.77 |
|                   | ICOS <sup>-</sup> cmT <sub>FH</sub> | R = -0.17<br>p = 0.37 | R = -0.12<br>p = 0.55 | R = -0.17<br>p = 0.39 | R = 0.11<br>p = 0.58 |
| IgG2 <sup>+</sup> | ICOS <sup>+</sup> cmT <sub>FH</sub> | R = -0.04<br>p = 0.86 | R = -0.06<br>p = 0.78 | R = -0.01<br>p = 0.94 | R = 0.20<br>p = 0.31 |
|                   | ICOS <sup>-</sup> cmT <sub>FH</sub> | R = -0.09<br>p = 0.66 | R = -0.08<br>p = 0.70 | R = -0.03<br>p = 0.90 | R = 0.15<br>p = 0.45 |
