# Supplementary material for: Production of IgG antibodies to pneumococcal polysaccharides is associated with expansion of ICOS+ circulating memory T follicular-helper cells which is impaired by HIV infection
Source: PubMed Central journal article supplement (PMC5413043; doi:10.1371/journal.pone.0176641), 2017-05-02
Supplement: pone.0176641.s008.pdf [file pone.0176641.s008.pdf]

|                   |                                     | PcP 4                | PcP 6B               | PcP 9V               | PcP 14                               |
|-------------------|-------------------------------------|----------------------|----------------------|----------------------|--------------------------------------|
| IgG1 <sup>+</sup> | ICOS <sup>+</sup> cmT <sub>FH</sub> | R = 0.41<br>p = 0.21 | R = 0.27<br>p = 0.42 | R = 0.25<br>p = 0.46 | R = 0.05<br>p = 0.89                 |
|                   | ICOS <sup>-</sup> cmT <sub>FH</sub> | R = 0.35<br>p = 0.29 | R = 0.14<br>p = 0.69 | R = 0.20<br>p = 0.56 | R = 9.3x10 <sup>-4</sup><br>p = 0.98 |
| IgG2 <sup>+</sup> | ICOS <sup>+</sup> cmT <sub>FH</sub> | R = 0.36<br>p = 0.27 | R = 0.23<br>p = 0.50 | R = 0.35<br>p = 0.29 | R = 0.23<br>p = 0.49                 |
|                   | ICOS <sup>-</sup> cmT <sub>FH</sub> | R = 0.32<br>p = 0.34 | R = 0.20<br>p = 0.56 | R = 0.32<br>p = 0.33 | R = 0.09<br>p = 0.79                 |
