# Supplementary material for: Production of IgG antibodies to pneumococcal polysaccharides is associated with expansion of ICOS+ circulating memory T follicular-helper cells which is impaired by HIV infection
Source: PubMed Central journal article supplement (PMC5413043; doi:10.1371/journal.pone.0176641), 2017-05-02
Supplement: pone.0176641.s009.pdf [file pone.0176641.s009.pdf]

| Immune correlate                                                                               | Interaction p-value               |                           |                                    |                           |                            |                           | Incident rate ratio (IRR)<br>(95% confidence interval) |                                                        |                                     |                                      |                                                                                                    |                                                                                                    |
|------------------------------------------------------------------------------------------------|-----------------------------------|---------------------------|------------------------------------|---------------------------|----------------------------|---------------------------|--------------------------------------------------------|--------------------------------------------------------|-------------------------------------|--------------------------------------|----------------------------------------------------------------------------------------------------|----------------------------------------------------------------------------------------------------|
|                                                                                                | ART-treated v<br>HIV seronegative |                           | ART-naive v<br>HIV<br>seronegative |                           | ART-treated v<br>ART-naive |                           | ART-treated HIV<br>patients                            |                                                        | ART-naive HIV<br>patients           |                                      | HIV seronegative subjects                                                                          |                                                                                                    |
|                                                                                                | IgG1 <sup>+</sup><br>ASCs         | IgG2 <sup>+</sup><br>ASCs | IgG1 <sup>+</sup><br>ASCs          | IgG2 <sup>+</sup><br>ASCs | IgG1 <sup>+</sup><br>ASCs  | IgG2 <sup>+</sup><br>ASCs | IgG1 <sup>+</sup><br>ASCs                              | IgG2 <sup>+</sup><br>ASCs                              | IgG1 <sup>+</sup><br>ASCs           | IgG2 <sup>+</sup><br>ASCs            | IgG1 <sup>+</sup><br>ASCs                                                                          | IgG2 <sup>+</sup><br>ASCs                                                                          |
| CD4 <sup>+</sup> T cell count (D0),<br>cells/ $\mu$ L                                          | 0.23                              | 0.50                      | 0.86                               | 0.85                      | 0.60                       | 0.84                      | 1.00<br>(0.99,1.00)<br>p = 0.98                        | 0.99<br>(0.99,1.00)<br>p = 0.39                        | 1.00<br>(0.99,1.00)<br>p = 0.57     | 0.99<br>(0.99,1.00)<br>p = 0.93      | 1.00<br>(0.99, 1.00)<br>p = 0.14                                                                   | 1.00<br>(0.99, 1.00)<br>p = 0.82                                                                   |
| Total IgM memory B cells<br>(CD20 <sup>+</sup> CD27 <sup>+</sup> IgM <sup>+</sup> ) (D0),<br>% | 0.89                              | 0.86                      | 0.28                               | 0.45                      | 0.30                       | 0.42                      | 0.98<br>(0.87,1.10)<br>p = 0.70                        | 0.98<br>(0.88,1.08)<br>p = 0.63                        | 0.76<br>(0.48,1.21)<br>p = 0.24     | 0.83<br>(0.58,1.21)<br>p = 0.34      | 0.99<br>(0.91, 1.08)<br>p = 0.77                                                                   | 0.97<br>(0.91, 1.03)<br>p = 0.29                                                                   |
| Total IgG memory B cells<br>(CD20 <sup>+</sup> CD27 <sup>+</sup> IgG <sup>+</sup> ) (D0),<br>% | 0.97                              | 0.36                      | 0.95                               | 0.56                      | 0.98                       | 0.94                      | 0.99<br>(0.85,1.16)<br>p = 0.96                        | 1.00<br>(0.89,1.14)<br>p = 0.87                        | 0.99<br>(0.76,1.29)<br>p = 0.95     | 0.99<br>(0.76,1.30)<br>p = 0.99      | 1.00<br>(0.80, 1.26)<br>p = 0.99                                                                   | 0.90<br>(0.74, 1.11)<br>p = 0.33                                                                   |
| PcP 6B-specific IgM <sup>+</sup><br>memory B cells (D0),<br>counts                             | 0.63                              | 0.61                      | 0.99                               | 0.23                      | 0.65                       | 0.65                      | 0.97<br>(0.90,1.05)<br>p = 0.53                        | 0.99<br>(0.93,1.07)<br>p = 0.98                        | 0.99<br>(0.94,1.06)<br>p = 0.93     | 1.02<br>(0.97,1.07)<br>p = 0.47      | 0.99<br>(0.95, 1.04)<br>p = 0.88                                                                   | 0.98<br>(0.94,1.02)<br>p = 0.29                                                                    |
| PcP 6B-specific IgG <sup>+</sup><br>memory B cells (D0),<br>counts                             | 0.60                              | 0.77                      | 0.27                               | 0.07                      | 0.19                       | 0.29                      | 0.95<br>(0.86,1.04)<br>p = 0.95                        | 0.97<br>(0.90,1.06)<br>p = 0.52                        | 1.03<br>(0.94,1.13)<br>p = 0.46     | 1.03<br>(0.97,1.09)<br>p = 0.37      | 0.98<br>(0.93,1.05)<br>p = 0.33                                                                    | 0.96<br>(0.92,1.00)<br>p = 0.07                                                                    |
| ICOS <sup>+</sup> cmT <sub>FH</sub> cells (D7), %                                              | <b>&lt;0.001</b>                  | <b>&lt;0.001</b>          | <b>&lt;0.001</b>                   | <b>&lt;0.001</b>          | 0.77                       | 0.52                      | 0.29<br>(1.84x10 <sup>-3</sup> ,<br>44.28)<br>p = 0.63 | 0.09<br>(1.26x10 <sup>-3</sup> ,<br>6.06)<br>p = 0.26  | 0.64<br>(0.09,<br>4.19)<br>p = 0.64 | 0.40<br>(0.06,<br>2.69)<br>p = 0.35  | 4.47x10 <sup>10</sup><br>(4.9x10 <sup>5</sup> ,<br>4.12x10 <sup>15</sup> )<br><b>p = &lt;0.001</b> | 3.25x10 <sup>8</sup><br>(8.53x10 <sup>3</sup> ,<br>1.24x10 <sup>13</sup> )<br><b>p = &lt;0.001</b> |
| ICOS <sup>-</sup> cmT <sub>FH</sub> cells (D7), %                                              | 0.44                              | 0.43                      | 0.95                               | 0.84                      | 0.42                       | 0.39                      | 0.07<br>(9.29x10 <sup>-5</sup> ,<br>49.81)<br>p = 0.42 | 0.18<br>(6.73x10 <sup>-4</sup> ,<br>45.60)<br>p = 0.54 | 1.15<br>(0.17,<br>7.92)<br>p = 0.89 | 2.17<br>(0.44,<br>10.67)<br>p = 0.34 | 1.05<br>(0.15,7.56)<br>p = 0.96                                                                    | 1.75<br>(0.48, 6.42)<br>p = 0.40                                                                   |
