# Supplementary material for: Production of IgG antibodies to pneumococcal polysaccharides is associated with expansion of ICOS+ circulating memory T follicular-helper cells which is impaired by HIV infection
Source: PubMed Central journal article supplement (PMC5413043; doi:10.1371/journal.pone.0176641), 2017-05-02
Supplement: pone.0176641.s010.pdf [file pone.0176641.s010.pdf]

| Immune correlate                                                                               | Interaction p-value               |                           |                                    |                           |                            |                           | Incident rate ratio (IRR)<br>(95% confidence interval)                       |                                                        |                                      |                                         |                                                                                                |                                                                     |
|------------------------------------------------------------------------------------------------|-----------------------------------|---------------------------|------------------------------------|---------------------------|----------------------------|---------------------------|------------------------------------------------------------------------------|--------------------------------------------------------|--------------------------------------|-----------------------------------------|------------------------------------------------------------------------------------------------|---------------------------------------------------------------------|
|                                                                                                | ART-treated v<br>HIV seronegative |                           | ART-naive v<br>HIV<br>seronegative |                           | ART-treated v<br>ART-naive |                           | ART-treated HIV<br>patients                                                  |                                                        | ART-naive HIV<br>patients            |                                         | HIV seronegative subjects                                                                      |                                                                     |
|                                                                                                | IgG1 <sup>+</sup><br>ASCs         | IgG2 <sup>+</sup><br>ASCs | IgG1 <sup>+</sup><br>ASCs          | IgG2 <sup>+</sup><br>ASCs | IgG1 <sup>+</sup><br>ASCs  | IgG2 <sup>+</sup><br>ASCs | IgG1 <sup>+</sup><br>ASCs                                                    | IgG2 <sup>+</sup><br>ASCs                              | IgG1 <sup>+</sup><br>ASCs            | IgG2 <sup>+</sup><br>ASCs               | IgG1 <sup>+</sup><br>ASCs                                                                      | IgG2 <sup>+</sup><br>ASCs                                           |
| CD4 <sup>+</sup> T cell count (D0),<br>cells/μL                                                | 0.45                              | 0.53                      | 0.79                               | 0.80                      | 0.47                       | 0.90                      | 1.00<br>(0.99,1.00)<br>p = 0.33                                              | 0.99<br>(0.99,1.00)<br>p = 0.38                        | 0.99<br>(0.99,1.00)<br>p = 0.67      | 0.99<br>(0.99,1.00)<br>p = 0.83         | 0.99<br>(0.99, 1.00)<br>p = 0.81                                                               | 1.00<br>(0.99, 1.00)<br>p = 0.89                                    |
| Total IgM memory B cells<br>(CD20 <sup>+</sup> CD27 <sup>+</sup> IgM <sup>+</sup> ) (D0),<br>% | 0.99                              | 0.74                      | 0.08                               | <b>0.045</b>              | 0.08                       | 0.06                      | 1.00<br>(0.91,1.10)<br>p = 0.97                                              | 0.99<br>(0.91,1.08)<br>p = 0.86                        | 0.61<br>(0.35,1.06)<br>p = 0.08      | 0.73<br>(0.53,0.99)<br><b>p = 0.048</b> | 1.00<br>(0.93, 1.08)<br>p = 0.98                                                               | 1.00<br>(0.96, 1.06)<br>p = 0.72                                    |
| Total IgG memory B cells<br>(CD20 <sup>+</sup> CD27 <sup>+</sup> IgG <sup>+</sup> ) (D0),<br>% | 0.86                              | 0.53                      | 0.81                               | 0.95                      | 0.92                       | 0.60                      | 0.92<br>(0.75,1.14)<br>p = 0.46                                              | 1.04<br>(0.92,1.17)<br>p = 0.54                        | 0.94<br>(0.69,1.28)<br>p = 0.71      | 0.97<br>(0.77,1.23)<br>p = 0.79         | 0.90<br>(0.73, 1.11)<br>p = 0.33                                                               | 0.96<br>(0.77, 1.19)<br>p = 0.71                                    |
| PcP 9V-specific IgM <sup>+</sup><br>memory B cells (D0),<br>counts                             | 0.06                              | 0.32                      | 0.09                               | <b>0.03</b>               | 0.90                       | <b>0.007</b>              | 1.02<br>(0.99,1.05)<br>p = 0.26                                              | 0.94<br>(0.89,0.99)<br><b>p = 0.01</b>                 | 1.02<br>(0.98,1.06)<br>p = 0.34      | 1.01<br>(0.99,1.05)<br>p = 0.26         | 0.98<br>(0.95,1.01)<br>p = 0.13                                                                | 0.97<br>(0.94,1.00)<br>p = 0.06                                     |
| PcP 9V-specific IgG <sup>+</sup><br>memory B cells (D0),<br>counts                             | 0.06                              | 0.40                      | 0.16                               | <b>0.04</b>               | 0.97                       | <b>0.02</b>               | 1.02<br>(0.99,1.06)<br>p = 0.18                                              | 0.95<br>(0.89,1.00)<br>p = 0.06                        | 1.02<br>(0.97,1.08)<br>p = 0.39      | 1.03<br>(0.99,1.08)<br>p = 0.18         | 0.98<br>(0.95,1.01)<br>p = 0.19                                                                | 0.98<br>(0.95,1.00)<br>p = 0.10                                     |
| ICOS <sup>+</sup> cmT <sub>FH</sub> cells (D7), %                                              | <b>&lt;0.001</b>                  | 0.09                      | <b>0.001</b>                       | 0.15                      | 0.08                       | 0.40                      | 1.5x10 <sup>-3</sup><br>(2.82x10 <sup>-6</sup> ,<br>0.83)<br><b>p = 0.04</b> | 0.89<br>(1.61x10 <sup>-3</sup> ,<br>8.68)<br>p = 0.33  | 0.66<br>(0.07,<br>5.93)<br>p = 0.71  | 0.12<br>(0.13,<br>6.24)<br>p = 0.90     | 3.47x10 <sup>7</sup><br>(1.13x10 <sup>3</sup> ,<br>1.07x10 <sup>12</sup> )<br><b>p = 0.001</b> | 5.7x10 <sup>3</sup><br>(0.04,<br>7.60x10 <sup>8</sup> )<br>p = 0.15 |
| ICOS <sup>-</sup> cmT <sub>FH</sub> cells (D7), %                                              | 0.05                              | 0.29                      | 0.65                               | 0.62                      | <b>0.04</b>                | 0.23                      | 9.5x10 <sup>-4</sup><br>(7.78x10 <sup>-7</sup> ,<br>1.16)<br>p = 0.06        | 0.14<br>(1.12x10 <sup>-3</sup> ,<br>17.93)<br>p = 0.43 | 2.13<br>(0.42,<br>10.89)<br>p = 0.36 | 3.17<br>(0.77,<br>12.97)<br>p = 0.11    | 1.32<br>(0.36, 4.80)<br>p = 0.68                                                               | 2.04<br>(0.71, 5.86)<br>p = 0.19                                    |
