# Supplementary material for: Production of IgG antibodies to pneumococcal polysaccharides is associated with expansion of ICOS+ circulating memory T follicular-helper cells which is impaired by HIV infection
Source: PubMed Central journal article supplement (PMC5413043; doi:10.1371/journal.pone.0176641), 2017-05-02
Supplement: pone.0176641.s011.pdf [file pone.0176641.s011.pdf]

| Immune correlate                                                                               | Interaction p-value               |                           |                                    |                           |                            |                           | Incident rate ratio (IRR)<br>(95% confidence interval)   |                                                          |                                     |                                        |                                                                                               |                                                                              |
|------------------------------------------------------------------------------------------------|-----------------------------------|---------------------------|------------------------------------|---------------------------|----------------------------|---------------------------|----------------------------------------------------------|----------------------------------------------------------|-------------------------------------|----------------------------------------|-----------------------------------------------------------------------------------------------|------------------------------------------------------------------------------|
|                                                                                                | ART-treated v<br>HIV seronegative |                           | ART-naive v<br>HIV<br>seronegative |                           | ART-treated v<br>ART-naive |                           | ART-treated HIV<br>patients                              |                                                          | ART-naive HIV<br>patients           |                                        | HIV seronegative subjects                                                                     |                                                                              |
|                                                                                                | IgG1 <sup>+</sup><br>ASCs         | IgG2 <sup>+</sup><br>ASCs | IgG1 <sup>+</sup><br>ASCs          | IgG2 <sup>+</sup><br>ASCs | IgG1 <sup>+</sup><br>ASCs  | IgG2 <sup>+</sup><br>ASCs | IgG1 <sup>+</sup><br>ASCs                                | IgG2 <sup>+</sup><br>ASCs                                | IgG1 <sup>+</sup><br>ASCs           | IgG2 <sup>+</sup><br>ASCs              | IgG1 <sup>+</sup><br>ASCs                                                                     | IgG2 <sup>+</sup><br>ASCs                                                    |
| CD4 <sup>+</sup> T cell count (D0),<br>cells/ $\mu$ L                                          | 0.50                              | 0.31                      | 0.79                               | 0.96                      | 0.92                       | 0.56                      | 1.00<br>(0.99,1.00)<br>p = 0.71                          | 0.99<br>(0.99,1.00)<br>p = 0.09                          | 1.00<br>(0.99,1.00)<br>p = 0.80     | 1.00<br>(0.99,1.00)<br>p = 0.93        | 1.00<br>(0.99, 1.00)<br>p = 0.20                                                              | 1.00<br>(0.99, 1.00)<br>p = 0.95                                             |
| Total IgM memory B cells<br>(CD20 <sup>+</sup> CD27 <sup>+</sup> IgM <sup>+</sup> ) (D0),<br>% | 0.99                              | 0.12                      | 0.14                               | <b>0.02</b>               | 0.15                       | 0.09                      | 0.91<br>(0.79,1.05)<br>p = 0.21                          | 0.89<br>(0.78,0.99)<br>p = 0.05                          | 0.64<br>(0.41, .01)<br>p = 0.06     | 0.63<br>(0.44,0.91)<br><b>p = 0.02</b> | 0.91<br>(0.82, 1.01)<br>p = 0.07                                                              | 0.99<br>(0.93, 1.05)<br>p = 0.66                                             |
| Total IgG memory B cells<br>(CD20 <sup>+</sup> CD27 <sup>+</sup> IgG <sup>+</sup> ) (D0),<br>% | <b>0.04</b>                       | 0.65                      | 0.11                               | 0.35                      | 0.57                       | 0.13                      | 0.62<br>(0.40,0.97)<br><b>p = 0.04</b>                   | 1.07<br>(0.93,1.24)<br>p = 0.32                          | 0.74<br>(0.51,1.07)<br>p = 0.11     | 0.84<br>(0.64,1.11)<br>p = 0.23        | 1.07<br>(0.82, 1.39)<br>p = 0.64                                                              | 1.00<br>(0.79, 1.29)<br>p = 0.97                                             |
| PcP 14-specific IgM <sup>+</sup><br>memory B cells (D0),<br>counts                             | 0.41                              | 0.54                      | 0.91                               | 0.42                      | 0.33                       | 0.92                      | 1.04<br>(0.94,1.15)<br>p = 0.42                          | 0.99<br>(0.92,1.08)<br>p = 0.92                          | 0.98<br>(0.93,1.04)<br>p = 0.57     | 0.99<br>(0.95,1.04)<br>p = 0.79        | 0.99<br>(0.92, 1.07)<br>p = 0.77                                                              | 0.97<br>(0.92,1.02)<br>p = 0.21                                              |
| PcP 14-specific IgG <sup>+</sup><br>memory B cells (D0),<br>counts                             | 0.59                              | 0.86                      | 0.60                               | 0.81                      | 0.40                       | 0.99                      | 1.04<br>(0.92,1.19)<br>p = 0.51                          | 0.99<br>(0.92,1.08)<br>p = 0.90                          | 0.98<br>(0.92,1.05)<br>p = 0.56     | 0.99<br>(0.95,1.05)<br>p = 0.85        | 1.00<br>(0.95,1.07)<br>p = 0.89                                                               | 0.99<br>(0.94, 1.03)<br>p = 0.56                                             |
| ICOS <sup>+</sup> cmT <sub>FH</sub> cells (D7), %                                              | <b>0.005</b>                      | 0.09                      | <b>0.001</b>                       | <b>0.045</b>              | 0.63                       | 0.64                      | 1.02<br>(2.76x10 <sup>-3</sup> ,<br>376.57)<br>p = 0.99  | 2.63<br>(0.02,<br>409.06)<br>p = 0.71                    | 0.20<br>(0.01,<br>3.56)<br>p = 0.27 | 0.73<br>(0.11,<br>4.70)<br>p = 0.74    | 3.86x10 <sup>9</sup><br>(2.8x10 <sup>3</sup> ,<br>5.30x10 <sup>15</sup> )<br><b>p = 0.002</b> | 2.3x10 <sup>5</sup><br>(1.09,<br>4.81x10 <sup>10</sup> )<br><b>p = 0.048</b> |
| ICOS <sup>-</sup> cmT <sub>FH</sub> cells (D7), %                                              | 0.84                              | 0.88                      | 0.37                               | 0.37                      | 0.89                       | 0.90                      | 1.13<br>(5.00x10 <sup>-4</sup> ,<br>2557.05)<br>p = 0.97 | 1.36<br>(1.76x10 <sup>-3</sup> ,<br>1044.39)<br>p = 0.93 | 0.64<br>(0.07,<br>5.65)<br>p = 0.69 | 0.88<br>(0.19,<br>4.08)<br>p = 0.87    | 2.54<br>(0.33,<br>19.24)<br>p = 0.37                                                          | 2.31<br>(0.55, 9.67)<br>p = 0.25                                             |
