# Supplementary material for: Production of IgG antibodies to pneumococcal polysaccharides is associated with expansion of ICOS+ circulating memory T follicular-helper cells which is impaired by HIV infection
Source: PubMed Central journal article supplement (PMC5413043; doi:10.1371/journal.pone.0176641), 2017-05-02
Supplement: pone.0176641.s012.pdf [file pone.0176641.s012.pdf]

A.

|                                  | Fold-increase in IgG1 PcP-specific antibodies at D28 |                    |                                 |                                    | Fold-increase in IgG2 PcP-specific antibodies at D28 |                                  |                                |                    |
|----------------------------------|------------------------------------------------------|--------------------|---------------------------------|------------------------------------|------------------------------------------------------|----------------------------------|--------------------------------|--------------------|
|                                  | PcP 4                                                | PcP 6B             | PcP 9V                          | PcP 14                             | PcP 4                                                | PcP 6B                           | PcP 9V                         | PcP 14             |
| HIV seronegative subjects (n=20) | R=0.36<br>p=0.12                                     | R= -0.09<br>p=0.70 | <b>R=0.45</b><br><b>p=0.047</b> | R=0.25<br>p=0.28                   | <b>R=0.50</b><br><b>p=0.02</b>                       | <b>R=0.54</b><br><b>p=0.01</b>   | <b>R=0.46</b><br><b>p=0.04</b> | R=0.35<br>p=0.13   |
| ART-naive HIV patients (n=11)    | <b>R=0.60</b><br>p=0.05                              | R= -0.04<br>p=0.92 | <b>R=0.67</b><br><b>p=0.02</b>  | R=0.24<br>p=0.48                   | R=0.25<br>p=0.47                                     | R= -0.28<br>p=0.40               | R=0.23<br>p=0.50               | R=0.09<br>p=0.79   |
| ART-treated HIV patients (n=28)  | R= -0.20<br>p=0.30                                   | R= -0.07<br>p=0.74 | R= -0.28<br>p=0.15              | <b>R= -0.63</b><br><b>p=0.0003</b> | R= -0.19<br>p=0.34                                   | <b>R= -0.41</b><br><b>p=0.03</b> | R= -0.15<br>p=0.44             | R= -0.29<br>p=0.14 |

B.

|                                  | Fold-increase in IgG1 PcP-specific antibodies at D28 |                    |                                |                                  | Fold-increase in IgG2 PcP-specific antibodies at D28 |                    |                  |                                |
|----------------------------------|------------------------------------------------------|--------------------|--------------------------------|----------------------------------|------------------------------------------------------|--------------------|------------------|--------------------------------|
|                                  | PcP 4                                                | PcP 6B             | PcP 9V                         | PcP 14                           | PcP 4                                                | PcP 6B             | PcP 9V           | PcP 14                         |
| HIV seronegative subjects (n=20) | R=0.31<br>p=0.19                                     | R= -0.14<br>p=0.55 | R=0.08<br>p=0.73               | R=0.03<br>p=0.89                 | <b>R=0.56</b><br><b>p=0.01</b>                       | R= -0.06<br>p=0.81 | R=0.20<br>p=0.41 | R= -0.02<br>p=0.94             |
| ART-naive HIV patients (n=11)    | <b>R=0.71</b><br><b>p=0.01</b>                       | R= -0.05<br>p=0.89 | <b>R=0.65</b><br><b>p=0.03</b> | R=0.34<br>p=0.31                 | R=0.31<br>p=0.36                                     | R= -0.25<br>p=0.45 | R=0.07<br>p=0.83 | R=9x10 <sup>-2</sup><br>p=0.98 |
| ART-treated HIV patients (n=28)  | R= -0.21<br>p=0.29                                   | R= -0.13<br>p=0.51 | R= -0.04<br>p=0.84             | <b>R= -0.46</b><br><b>p=0.01</b> | R= -0.20<br>p=0.31                                   | R= -0.07<br>p=0.72 | R=0.07<br>p=0.83 | R= -0.33<br>p=0.08             |

Correlations with an R value >0.4 and p values <0.05 are bolded while negative correlations are also italicized.
