# Supplementary material for: Production of IgG antibodies to pneumococcal polysaccharides is associated with expansion of ICOS+ circulating memory T follicular-helper cells which is impaired by HIV infection
Source: PubMed Central journal article supplement (PMC5413043; doi:10.1371/journal.pone.0176641), 2017-05-02
Supplement: pone.0176641.s013.pdf [file pone.0176641.s013.pdf]

| Characteristic                                       | ART-treated HIV patients         | ART-naive HIV patients            | HIV seronegative subjects |
|------------------------------------------------------|----------------------------------|-----------------------------------|---------------------------|
| No. Subjects                                         | 28                               | 11                                | 20                        |
| Age (years)                                          | 50.5 <sup>a</sup><br>(30 – 72)   | 37<br>(19 – 48)                   | 52.5<br>(28 – 76)         |
| Sex, male/female                                     | 26/2 <sup>b</sup>                | 8/3                               | 12/8                      |
| CD4 <sup>+</sup> T cell count (cells/ $\mu$ L)       | 774 <sup>c</sup><br>(310 – 2058) | 646<br>(406 – 1120)               | 985<br>(580 – 1500)       |
| CD8 <sup>+</sup> T cell count (cells/ $\mu$ L)       | 945 <sup>d</sup><br>(308 – 1836) | 1012<br>(532 – 1972)              | 493<br>(162 – 810)        |
| Nadir CD4 <sup>+</sup> T cell count (cells/ $\mu$ L) | 233 <sup>e</sup><br>(16 – 624)   | 561<br>(225 – 1120)               | N/A                       |
| B cells (% of lymphocytes)                           | 10 <sup>f</sup><br>(4 – 22)      | 9<br>(4 – 23)                     | 15<br>(6 – 25)            |
| HIV-1 viral load (copies/mL)                         | <40                              | 6310 <sup>g</sup><br>(<40-288403) | N/A                       |
| Years on ART                                         | 9.25<br>(1.3 – 21.7)             | N/A                               | N/A                       |

<sup>a</sup> Data presented as median (range)

<sup>b</sup> Gender significantly different between ART-treated and HIV seronegative subjects ( $p = 0.01$ ; Fisher's exact test).

<sup>c</sup> CD4<sup>+</sup> T cell counts significantly different between ART-treated patients ( $p = 0.007$ ) and ART-naive ( $p = 0.001$ ) compared to HIV seronegative subjects (Mann-Whitney t-test).

<sup>d</sup> CD8<sup>+</sup> T cell counts significantly different between ART-treated patients ( $p = 0.004$ ) and ART-naive ( $p = 0.008$ ) compared to HIV seronegative subjects (Mann-Whitney t-test).

<sup>e</sup> Nadir CD4<sup>+</sup> T cell count significantly different between ART-treated and ART-naive HIV patients ( $p = 0.0007$ ; Mann-Whitney t-test).

<sup>f</sup> B cells significantly different between ART-treated patients and HIV seronegative subjects ( $p = 0.01$ ; Mann-Whitney t-test).

<sup>g</sup> ART-naive group included two patients with an elite controller phenotype
